# Supplementary material
Source: Springer Nature journal article supplement (https://www.springermedizin.de/resource/supplementary/12985_2007_297_MOESM5_ESM.pdf/9607734)
Supplement: MOESM5 [file 9607734]

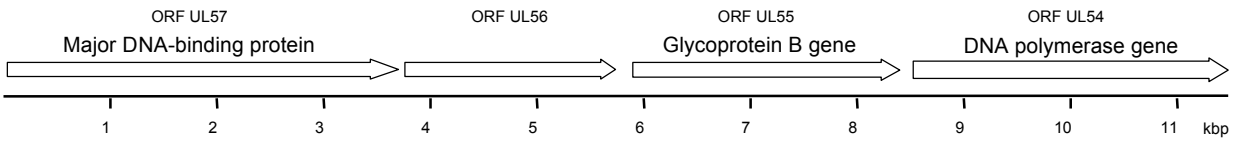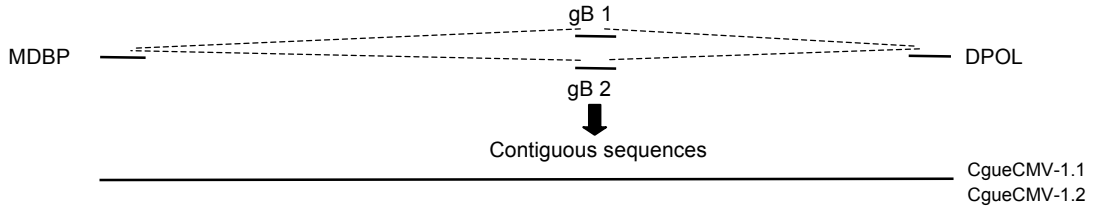

**A**

|            |                                                                                                        |     |
|------------|--------------------------------------------------------------------------------------------------------|-----|
| CgueCMV1.1 | MNLLQKLCVVCCKNEYAMELECKLYCDPNVLAEESSPFKRNALAIAYLYRKYIYPEVVRQNRQTSLTLYMEMILKALYEDTELLDRALKAYCRPRDM      | 100 |
| CgueCMV1.2 | .....                                                                                                  | 100 |
|            | EYRTILRLDRCDRHHTVELTPTETVKFVSVTLATLNDIERFLCKMNYVYAILAPETGLEVCSQLLQLLRRLCGVSPVACQEAIVEGTTCQAQCYEELTIIP  | 200 |
|            | .....V.....                                                                                            | 200 |
|            | NQGRSLNKRLLQGLLNHNHIVHRPSSQCDVNIQTVEQDLDDLTPRIPSLPGVLTALKNLFSSSSVYHSYIQEAEEALREYNLFTDIPARIYSLSDPTFYWSR | 300 |
|            | .....                                                                                                  | 300 |
|            | TSEVIVKRVGISIQQLNVYHHLRCVLMNSLNSHLYGEDVEDIFVVGEKLSREERLFGVSVFAAPSRIDILITSLSIQAFEGNVPFNKLHESNEMYTKIK    | 400 |
|            | .....                                                                                                  | 400 |
|            | CILEEIRRPVDPGAAGEAGASGASRQDRPNTSNN-SDAQNEDDDFLDWRDARTMHNVTRVNMKRKAYLQKVSEVGYAKVIRCIKSQLRSLTKLIDVN      | 499 |
|            | .....L.....N.....                                                                                      | 500 |
|            | LIGTVCLDFISKLMNGFIYRTQYLDNPDLDVAQLLSYDEHLYVNNI IHKSLPAESLPLLGQQIYQLCNGPLFTHCTDRYPLSHVDMAYACDNAGVLP     | 599 |
|            | .....E.....                                                                                            | 600 |
|            | HIKDDLKCAKEGTYVPEWVVVYQGFNFSDQCQDLNMLQKEMKHWRELVLVSVLYNETFGKQLTIACLRDELTTDRDLLTYNKEVPLLRHREGTYLK       | 699 |
|            | .....                                                                                                  | 700 |
|            | SKDLYLLYRHLARPDEQRDVFQPD SACVPAAPRRVRAPKRPRNSLLLDLARDQDDQLVPGCLR                                       | 768 |
|            | .....C.....                                                                                            | 769 |
|            | <b>UL56 (complete)</b>                                                                                 |     |
| CgueCMV1.1 | MTQIWFVACASLLTVNSATSTSNVSSPTPASSSSDRTPASSTAADNGTAPFIANTTVRTNEVSLDKARFPYRVCMSQGTDFLFRDNNIQCEAFK         | 100 |
| CgueCMV1.2 | ..K.....V.....I.....A.....V.....N---TPTSTS.....GLVP...L...LD...RSKY.....A.....E.....                   | 97  |
|            | PTKEDFDEGIMLVYKRDIRAYTFKVHVYQKVTQRQSYIYINVMGQTVEHLVPMWEVHYINKLRNCYNSILRVMGDKRTYYSYHKDSFVNETMVLVP       | 200 |
|            | .....N.....L.....ST.....K...E.....V.RI.....V.F.N.EP.....M.T.....L..Q                                   | 197 |
|            | DFPSNTHSSRFVTKQLWHKPGSTWLYTTSNVMCMVTVTARSRYPNFVTSAGEVVDISPPYNGSNDKHGFENRDKPHLKRNYTMVQYVYADNAPES        | 300 |
|            | ..Y.....T.....K...A.....I.....AS.D.....T.G.....TK...VFN..S..E...RE.V.QV                                | 297 |
|            | AHPLVAFPERADSLMSWDIVDESNNTCQYALWEVSEIRIRSEAEHTYHTSASMTATPLSKKETVNIISDPALECVREVEARLEKLFNTTYNETYAKSGN    | 400 |
|            | N..M.....L..A.....F...T.....D.....SK.S...T..I..E...T.IKD.ASEQ.Q.IY.Q...S..VQ...                        | 397 |
|            | VTVYETGGLIVFWLVPEKSLLEMERLTKNSTNAT--VRSKRSLDNG--NSTEVLSHVVYAQLQPTDYDLRNYINRALRQIADAWCWDKQKRTAEVLKEL    | 496 |
|            | MSI.....Q.RAIW..KQ.NDGRQ.V.NSS.HR..T.SSLL.N.....QN.....K.....L..L                                      | 497 |
|            | SKINPSAMLSAIYDKPIAARHIGDVISLAKCEVVDQDSVQVVRDMHVKGQNDVCYSRPVVLFRPKNSSHVHYGQLEHNEILLGRHRETCEVPSLKIFI     | 596 |
|            | .....E.T...I...D.TG...T...Q...Y.....T.....                                                             | 597 |
|            | AGNTSYEYVDYLFKGEIPLESIPTIDLIALDIDPLENTDFKALELYSQDELASNVDFLEEIMREFNSYRQRIVPMEDKVFDPVPSYLRGLDLDMSGLG     | 696 |
|            | ...VY..R..S.D.....M.S.....E...S.....D.....T.G.....G.....                                               | 697 |
|            | AAGKALGVAIGAVGAVASIMDGIAGFLKNPFGSFTVVLFLAVLGVYIYIMRQRMYESPLQHLFPYVVPVAVHKETPPPPSYEESVYASIKKKSAS        | 796 |
|            | .....                                                                                                  | 796 |
|            | PTREFSVEDAYQMLLALQRLDQEKRNKSEDDVVEFPFADGADRGLDLRLRYRNRGKYLQNEYEV                                       | 862 |
|            | .....                                                                                                  | 862 |
|            | <b>Glycoprotein B (UL55; complete)</b>                                                                 |     |
| CgueCMV1.1 | MFFNPYLSGGRKPSAPVAKRPVDKTFLEIVPRGAMVDGQSGLIKHKHKTGRGLMFYREIKHMLDNDMAWPCPLPPPPSIETFARRISGLPKFHTYDQVDG   | 100 |
| CgueCMV1.2 | .....T.....                                                                                            | 100 |
|            | VLAHDTSEAVSPRYRPHIIPSGNVLRFFGATEQGYTICVNVFGQRSYFYCQYPDGDRDLRLDIASVSELVSEPRMAYALSIVQTKMSIYGYGTQVFPDLY   | 200 |
|            | .....D.....                                                                                            | 200 |
|            | RVISNNSMAKIGEHLLDQGIPIVFEVRVDLTRLVIDKMTTFGWCNVRYDWRGYSKSSCTDFEVDVCDVADLIALADDTSWPVYRCLSPDIECMSCG       | 300 |
|            | .....T.....E.....                                                                                      | 300 |
|            | GGFPVAEQVDDIVIQISVCVYETGGTGREGEESAVFGTSGHLFLTIGCCQGVGTADVVEFPSEYEMLLGFLIFPKRYAPCFVTGYNINSDFKYILTRL     | 400 |
|            | .....                                                                                                  | 400 |
|            | EFYVKVNPNPYKSLPCHGRFNATPVRKNHATTTATKVFISGCVVIDMPVCMKATNSPNYKLNMTMAELYLQKHKEDLSYKIEPVKFSVGAEGRAQVQYKY   | 500 |
|            | .....                                                                                                  | 500 |
|            | CVQDAVLKDLFNTINFHYEAGAIARLAKIPMRRVFDGQQIRIYTSLLDECACRDFVLPNHKGAETSSDATTEVSYQGATVFEPEVGYSDFPVVVFDA      | 600 |
|            | .....                                                                                                  | 600 |
|            | SLYPSIIMAHNLCYSTLVMPGGECPADDSQLFTVELENGVYTRFVKNTVRLSILSELLTKWVSQRRAVRETRMGCDPVRMLLDKEQLALKVTNCFYFG     | 700 |
|            | .....                                                                                                  | 700 |
|            | FTGVVNGMPCPIAASITRIGRDLMLRTSRFVNENFAEPCFLHNFNREDYSGDPVEVKV                                             | 761 |
|            | .....                                                                                                  | 761 |
|            | <b>DNA polymerase (UL54; partial)</b>                                                                  |     |

**B**
